## Research Article

# Resveratrol enhances matrix biosynthesis of nucleus pulposus cells through activating autophagy via the PI3K/Akt pathway under oxidative damage

Jinlou Gao<sup>1,\*</sup>, Qingyun Zhang<sup>2,\*</sup> and Lin Song<sup>1</sup><sup>1</sup>Department of Orthopedic Surgery, The Cancer Hospital of Liaocheng City, Liaocheng 252000, China; <sup>2</sup>Department of Traumatic Orthopedics, The Chinese Medicine Hospital of Liaocheng City, Shandong Traditional Chinese Medicine University, Liaocheng 252000, China

Correspondence: Lin Song (sdclsl1984@163.com)

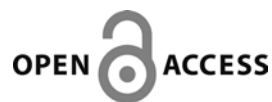

The decrease in nucleus pulposus (NP) matrix production is a classic feature during disc degeneration. Resveratrol (RSV) is reported to play protective effects under many pathological factors. The present study aims to study the effects of RSV on NP matrix homeostasis under oxidative damage and the potential mechanism. Rat NP cells were exposed to H<sub>2</sub>O<sub>2</sub> solution to create an oxidative damage. RSV and the 3-methyladenine (3-MA) were added along with the culture medium to respectively investigate the role of RSV and cellular autophagy. NP matrix synthesis was evaluated by the expression of macromolecules (aggrecan and collagen II) and glycosaminoglycan (GAG) content. Activation of cellular autophagy was assessed by the expression of several molecular markers. Additionally, activity of the PI3K/Akt pathway was also evaluated to study its potential role. Compared with the control group (NP cells treated with H<sub>2</sub>O<sub>2</sub>), RSV significantly up-regulated expression of matrix macromolecules (aggrecan and collagen), promoted GAG production, and increased the expression of autophagy-related markers (Beclin-1 and LC-3). Further analysis showed that inhibition of autophagy by 3-MA partly attenuated NP matrix production. Additionally, RSV increased activity of the PI3K/Akt pathway compared with the control NP cells, but it was not affected by the addition of 3-MA. RSV plays a protective role in enhancing NP matrix synthesis under oxidative damage. Mechanistically, activation of the cellular autophagy via the PI3K/Akt pathway may participate in this process. RSV may be an effective drug to attenuate oxidative stress-induced disc degeneration.

## Introduction

Intervertebral disc (IVD) degeneration is the major cause of neck or back pain syndrome, which contributes to the drop in life quality and even disability in adults [1]. This disease has a widespread prevalence with an estimated 80% of adults are known to experience low back pain (LBP) at least once in their lifetime [2]. The pathogenesis of disc degeneration contains a complex signaling network and various key molecules [3,4]. Currently, the pathogenesis of disc degeneration has not been clearly elucidated. Therefore, a deeper understanding about the molecular mechanism of disc degeneration will contribute to the development of new treatments for preventing and retarding disc degeneration.

The IVD, a heterogeneous and fibrocartilaginous tissue, is the biggest avascular tissue within the body. It contains three interdependent and structurally connected parts: cartilaginous

\*These authors contributed equally to this work.

Received: 08 April 2018

Revised: 30 April 2018

Accepted: 08 May 2018

Accepted Manuscript Online:  
11 May 2018Version of Record published:  
6 July 2018

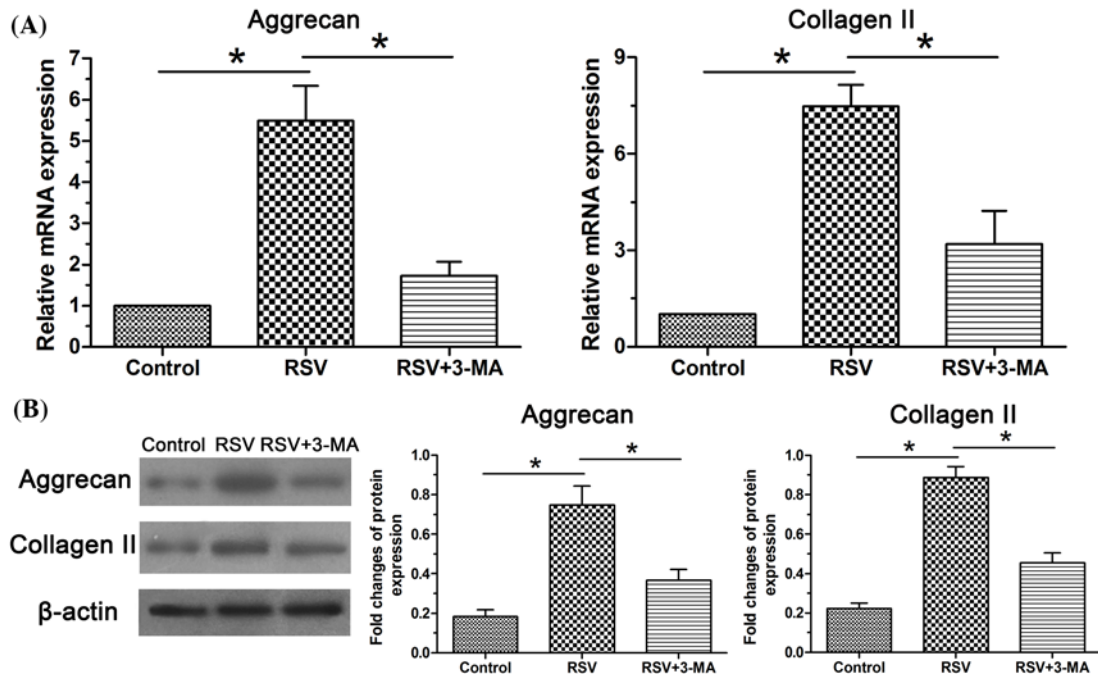

**Figure 1. Expression of matrix macromolecules in NP cells**

(A) Real-time PCR analysis of mRNA expression of aggrecan and collagen II. (B) Western blot analysis of protein expression of aggrecan and collagen II. Data are expressed as mean  $\pm$  S.D.,  $n=3$ . \*Significant difference ( $P<0.05$ ) between two groups.

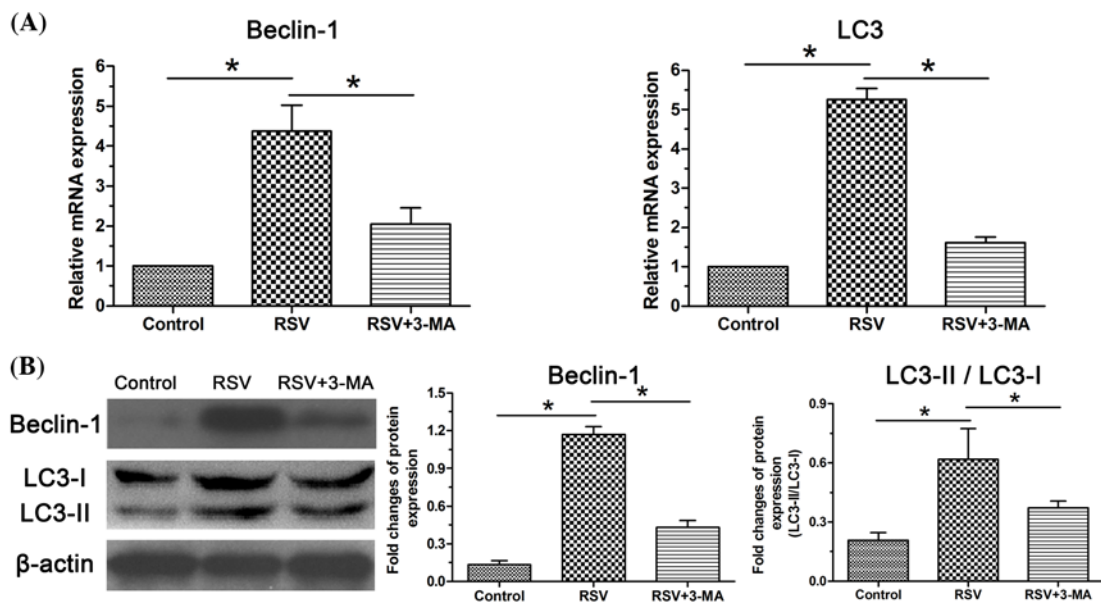

**Figure 2. Expression of autophagy-related molecules in NP cells**

(A) Real-time PCR analysis of mRNA expression of Beclin-1 and LC3. (B) Western blot analysis of protein expression of Beclin-1 and the ratio of LC3-II/LC3-I. Data are expressed as mean  $\pm$  S.D.,  $n=3$ . \*Significant difference ( $P<0.05$ ) between two groups.

endplates (CEPs), annulus fibrosus (AF), and nucleus pulposus (NP). Specifically, the central NP is a gelatinous matrix containing abundant water, proteoglycan, and collagen II [5]. During disc degeneration, the extracellular matrix (ECM) within the NP region was degraded and limited to renew [6]. These degenerative changes in NP matrix ultimately frustrate disc's biomechanical properties and thus affect spinal stability [7]. Therefore, the maintenance of a healthy matrix homeostasis is a key aspect in retarding disc degeneration.

Autophagy, a necessary cellular self-eating process, is one of the most important mechanisms for the maintenance of cellular homeostasis by degrading cytosolic macromolecules and damaged organelles under normal physiological and/or pathological conditions [8]. Recently, autophagy has become a research hotspot. Increasing evidence has showed that autophagy dysfunction participates in many degenerative diseases, such as osteoarthritis [9] and neurodegeneration [10]. Previously, a low basal level of autophagy was observed in the NP cells from non-degenerative adults rats, partly revealing the involvement of autophagy in normal disc NP cell biology [11]. However, autophagy is significantly increased in the degenerative rat NP cells [12,13]. Oppositely, Jiang et al. [14] has reported that there are decreased autophagosome, down-regulated expression of Beclin-1, and decreased ratio of LC3-II to LC3-I in NP cells of patients with degenerative discs compared with those in NP cells of patients with non-degenerative discs. Collectively, these reports show sufficient evidence for the existence of autophagy in degenerative disc NP cells at either higher or lower levels, indicating that autophagy may play different roles under the stimulation of different pathological factors in disc NP cells.

Resveratrol (RSV) is a phytoalexin identified in peanuts, grapes, and other plants. Previous studies demonstrated that RSV has a wide range of protective effects in different cell types, such as anti-inflammatory, anti-ageing, anti-cancer, and cartilage protection [15]. Several studies have shown sufficient rationale for the potential therapeutic use of RSV in retarding and/or regenerating disc degeneration in terms of inhibiting disc cell apoptosis, attenuating disc cell senescence, and decreasing the expression of matrix degradation enzymes [16-20]. As the initiation and progression of disc degeneration are closely associated with oxidative stress [21], the present study was to assess whether RSV has any inhibitory effects on oxidative damage-induced decrease in NP matrix synthesis.

## Materials and methods

### Rat NP cell isolation and culture

All experiments in the present study were approved by the Ethics Committee at The Chinese Medicine Hospital of Liaocheng City, Shandong Traditional Chinese Medicine University [SLK(LU) 2011-0121]. NP cells were isolated from rat lumbar discs (L1-L6) according to a method described in a previous study [22]. Specifically, 32 healthy Sprague-Dawley rats (female, 4-6 weeks old, and 250-270 g weight) were killed by excessive CO<sub>2</sub> inhalation. Then, the spinal column was separated under aseptic conditions and the individual IVDs were collected. After the central gelatinous NP tissue was removed, it was digested with 0.1% collagenase for 2 h at 37°C, with intermittent shaking every 30 min. Then, the separated NP cells and partially digested tissues were incubated with complete DMEM/F12 culture medium (Gibco, U.S.A.) supplemented with 10% FBS (Gibco, U.S.A.) under standard culture conditions (37°C, 21% O<sub>2</sub>, and 5% CO<sub>2</sub>). When the NP cells grew to 80-90% confluence, they were dispersed using 0.25% trypsin (Gibco, U.S.A.) and then re-suspended in appropriate culture plates. In the present study, the second-passage NP cells were used in all experiments.

### Design of experiment groups

To reach the study objective, three groups was designed: (i) Control NP cells treated with H<sub>2</sub>O<sub>2</sub>, (ii) NP cells treated with H<sub>2</sub>O<sub>2</sub> and RSV, and (iii) NP cells treated with H<sub>2</sub>O<sub>2</sub>, RSV, and 3-methyladenine (3-MA). All NP cells in each group were treated with test compounds for 48 h. Here, the oxidative damage but not the cytotoxicity was created using the H<sub>2</sub>O<sub>2</sub> (100 µg/ml) according to a recent study [19]. All NP cells were treated with the base level of H<sub>2</sub>O<sub>2</sub> (100 µg/ml). RSV (50 µM) was added along with the culture medium to investigate its protective effects. Additionally, 3-MA (5 mM) was added along with the culture medium to investigate the role of autophagy in this process.

### RNA extraction and real-time PCR analysis

Total RNA from the cultured NP cells were isolated using TRIzol reagent (Invitrogen, U.S.A.) according to the manufacturer's instructions. The single-stranded cDNA templates were synthesized using the PrimeScript™ II First Strand cDNA synthesis kit (TaKaRa, Japan). Then, real-time PCR (3 min at 95°C, followed by 35 amplification cycles of 10 s at 95°C, 12 s at 56°C, and 10 s at 72°C) was performed on a real-time PCR machine (Thermo Scientific, Rockford, U.S.A.) with the method of SYBR Green detection chemistry (TOYOBO, Japan). The primers were shown in the Table 1. β-actin was used to normalize the expression of target genes. Gene expression was calculated with the method of  $2^{-\Delta\Delta C_t}$ .

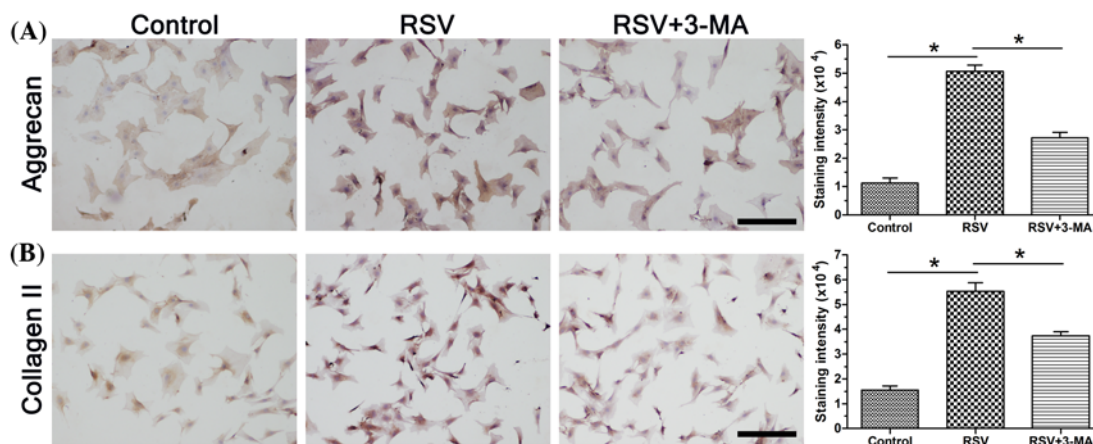

**Figure 3.** ICC staining of matrix macromolecules in NP cells

(A) Immunostaining and staining intensity analysis of aggrecan. (B) Immunostaining and staining intensity analysis of collagen II. Magnification: 200 $\times$ ; scale =100  $\mu$ m;  $n=3$ . Data are expressed as mean  $\pm$  S.D. \*Significant difference ( $P<0.05$ ) between two groups.

**Table 1** Primers of target genes

| Gene                            | Forward (5'–3')          | Reverse (5'–3')           |
|---------------------------------|--------------------------|---------------------------|
| <i><math>\beta</math>-actin</i> | CCGCGAGTACAACCTTCTTG     | TGACCCATACCCACCATCAC      |
| <i>Aggrecan</i>                 | ATGGCATTGAGACAGCGAA      | GCTCGGTCAAAGTCCAGTGT      |
| <i>Collagen II</i>              | GCCAGGATGCCCGAAAATTAG    | CCAGCCTTCTCGTCAAATCCT     |
| <i>Beclin-1</i>                 | GCGGCTCCTATTCCATCAA      | AACTACGGCAGGGCTCTT        |
| <i>LC3</i>                      | CGAGAGCGAGAGAGATGAAGACGG | GGTAAC GTCCTTTTTGCCTTGGTA |

### Immunocytochemical staining assay

NP cells were seeded on the coverslips and incubated with different test compounds for 48 h. After NP cells were washed with phosphate buffer solution (PBS), they were fixed with 4% paraformaldehyde for 20 min at 4 $^{\circ}$ C. Thereafter, NP cells were permeated with 0.3% Triton X-100 (Beyotime, China) for 45 s and blocked with 5% bull serum albumin (BSA, Beyotime, China) for 30 min at room temperature. Then, NP cells were incubated with primary antibodies (aggrecan: Novus, NB600-504; collagen II: Novus, NB600-844; all diluted at 1:300) at 4 $^{\circ}$ C. On the following day, NP cells were washed with PBS and incubated with the corresponding HRP-conjugated secondary antibodies (goat anti-mouse IgG, diluted 1:200, Beyotime, China). Finally, NP cells were sequentially incubated with diaminobenzidine (DAB) and Hematoxylin to develop the positive staining and stain the nucleus, respectively. The stained NP cells were observed under a light microscope (Olympus EX51, Japan) and the staining intensity was analyzed using the Image-Pro Plus software (version 5.1, Media Cybernetics, Inc.).

### Western blot assay

Western blot assay was carried out based on the standard procedure. Briefly, after the cultured NP cells were lysed using the RIPA lysis solution (Beyotime, China), the lysates were separated on an SDS/PAGE and transferred on to the PVDF membrane (Beyotime, China). The PVDF membranes were blocked with 5% BSA for 1 h at room temperature. Then, they were incubated with primary antibodies ( $\beta$ -actin: Abcam, ab8226; aggrecan: Novus, NB600-504; collagen II: Novus, NB600-844; Beclin-1: Abcam, ab207612; LC3: Abcam, ab48394; Akt: Cell Signaling Technology, #4691; p-Akt: Cell Signaling Technology, #4060; all diluted at 1:1000) overnight at 4 $^{\circ}$ C and the HRP-conjugated secondary antibodies (goat anti-mouse IgG and goat anti-rabbit IgG, diluted 1:200, Beyotime, China) for 2 h at room temperature. Subsequently, the PVDF membranes were treated with ECL Plus (Thermo, U.S.A.) according to the manufacturer's instructions. Blot intensity was calculated by densitometric analysis using the ImageJ software (National Institutes of Health, U.S.A.). Protein expression of target molecules was normalized to that of  $\beta$ -actin.



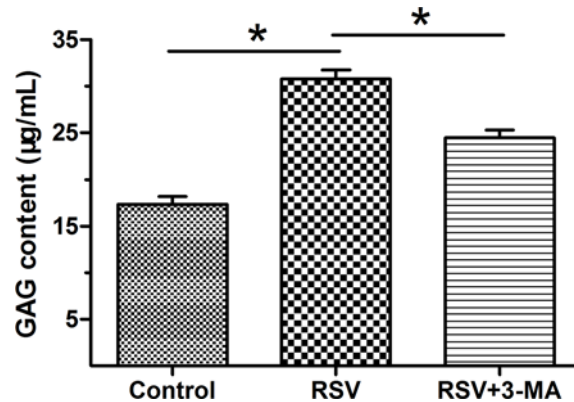

**Figure 4. GAG content measurement in NP cells**

Data are expressed as mean  $\pm$  S.D.,  $n=3$ . \*Significant difference ( $P<0.05$ ) between two groups.

## Glycosaminoglycan content measurement

Glycosaminoglycan (GAG) content of the cultured NP cells was quantitated by 1,9-dimethyl methylene blue (DMMB) assay as described in a previous study [23]. Briefly, the cultured NP cells were collected and digested by 5 mg/ml papain (Sangon, Biotech Co., Ltd., China) for 6 h at 60°C. Then, the GAG content in the digested solution was calculated according to the absorbance value at 525 nm. Additionally, the shark cartilage chondroitin sulphate (Sigma, U.S.A.) was used as a standard in the DMMB assay.

## Statistical analysis

Each experiment was performed in triplicate. Results are expressed as mean  $\pm$  S.E.M. and the statistical analysis was performed using SPSS 17.0 software. Intergroup difference was analyzed by the one-way ANOVA. The post hoc test was determined by the LSD test. A statistical significance was regarded when  $P<0.05$ .

## Results

### Real-time PCR and Western blot analysis of matrix macromolecules

Gene expression and protein expression of NP matrix macromolecules (aggrecan and collagen II) were analyzed. Results showed that expression of aggrecan and collagen II in the RSV group was significantly up-regulated at both gene and protein levels compared with the control group. When the cellular autophagy was inhibited by the 3-MA, their expression levels were partly decreased (Figure 1).

### Real-time PCR and Western blot analysis of autophagy-related molecules

Similarly, gene expression and protein expression of cellular autophagy-related markers (Beclin-1, LC3) were analyzed to investigate the role of autophagy. Results showed that expression of these two autophagy-related markers in the RSV group was significantly increased at both gene and protein levels compared with the control group. However, the inhibitor 3-MA partly decreased their expression when it was added along with the culture medium in the RSV-treated NP cells (Figure 2).

### ICC analysis of matrix protein deposition

We analyzed matrix protein deposition using the method of immunocytochemical (ICC). Results showed that the staining intensity of these matrix proteins in the RSV group was higher than that in the control group, whereas the inhibitor 3-MA obviously attenuated the positive effects of RSV on matrix protein deposition in the RSV + 3-MA group (Figure 3).

### GAG content

GAG is one of main matrix composite within the NP tissue. Results showed that though RSV increased GAG content compared with the control NP cells, it can be partly inhibited by the inhibition of cellular autophagy (Figure 4).

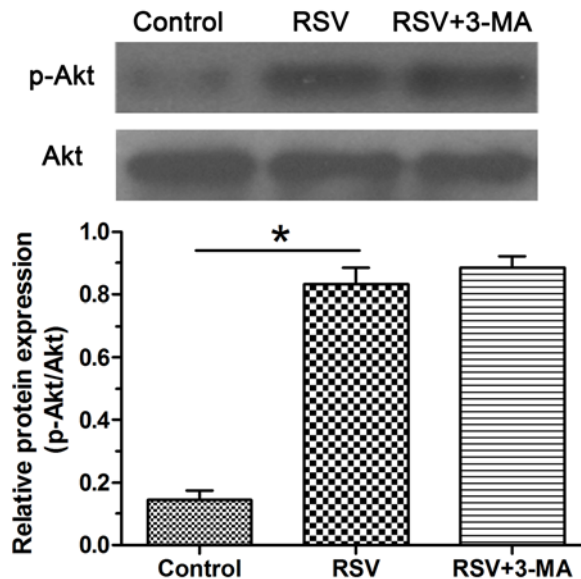

**Figure 5. Activity of the PI3K/Akt pathway in NP cells**

Activity of the PI3K/Akt pathway was expressed as the ratio of p-Akt expression to the total Akt expression. Data are expressed as mean  $\pm$  S.D.,  $n=3$ . \*Significant difference ( $P<0.05$ ) between two groups.

## Activity of the PI3K/Akt pathway

To study whether the PI3K/Akt pathway is involved in this process, we evaluated the activity of this pathway by Western blot assay. Results showed that p-Akt expression in the RSV group was higher than that in the control group, however, p-Akt expression was not significantly affected by the addition of 3-MA in the RSV + 3-MA group (Figure 5).

## Discussion

Disc degeneration is a main contributor to LBP [1]. Oxidative stress is known to be closely correlated with disc pathogenesis and progression [21]. Until now, the precise role of cellular autophagy during disc degeneration is controversial [24]. Previous studies have demonstrated the protective effects against oxidative damage in disc tissue and other tissues [15]. However, whether RSV has protective effects against oxidative damage-induced NP matrix decrease is unclear. In the present study, we reported for the first time that RSV enhanced NP matrix biosynthesis under oxidative damage through activating autophagy via the PI3K/Akt pathway.

The increase in NP matrix degradation or decrease in NP matrix synthesis is one of the most common features during disc degeneration. Aggrecan and collagen II are the two macromolecules within the disc NP matrix [25]. An adequate NP matrix production is implicated to maintain the disc's mechanical property and thus the spinal stability [26]. It has been well established that oxidative stress is harmful to disc cell's normal biology, including matrix synthesis and cell viability [21]. In the present study, we used the  $H_2O_2$  to create an oxidative but not cytotoxic environment according to a recent method [19]. However, rat NP tissue contains lots of notochordal cells. There are no accurate molecules to distinguish NP cell from notochordal cells. Therefore, care should be taken when using our results to explain disc degeneration in adults.

Autophagy is proved to be a self-protective process that can maintain homeostasis under certain disadvantageous conditions [27]. Autophagy and oxidative stress are closely related since the former is known to play a protective role against the later [28]. Recently, many studies have demonstrated that some pathological factors, including mechanical loading, high oxygen tension, high glucose, and inflammatory cytokines, are able to induce oxidative stress reaction and thus contribute to catabolic metabolism of disc matrix [29]. A previous study has showed that the rapamycin (an autophagy activator) decreased the level of MMP-3, MMP-9, and ADAMTS-4, whereas the 3-MA (an autophagy inhibitor) produced an opposite effect in the NP cells treated with inflammatory cytokines (TNF- $\alpha$  and IL-1 $\beta$ ) [30]. Thus, autophagy may prevent the catabolic metabolism of ECM to play a protective role in retarding disc degeneration.

RSV is a natural activator of cellular autophagy and is often studied in recent studies [18,19]. Studies have reported that RSV attenuates oxidative stress injury in other cells by regulating nuclear factor- $\kappa$ B (NF- $\kappa$ B) and mitogen-activated protein kinase (MAPK) signaling pathways [31,32]. In the present study, we found that RSV enhanced the expression of autophagy-related markers (Beclin-1 and LC-3) and expression of matrix macromolecules (aggrecan and collagen II), and that activity of the PI3K/Akt pathway showed a similar trend. However, we found that when the autophagy was inhibited by the 3-MA, expression of matrix macromolecules (aggrecan and collagen II) decreased whereas the activity of the PI3K/Akt pathway was not changed. Based on our own results and previous reports [8] about the positive effects of autophagy on NP matrix metabolism, it can be deduced that RSV can enhance matrix synthesis through activating cellular autophagy via the PI3K/Akt pathway. In line with us, a previous study showed that RSV-induced autophagy is regulated by the PI3K/Akt/mTOR pathway in prolactinoma cells [33]. However, the present study did not further verify the role of the PI3K/Akt pathway using item specific inhibitor in the RSV group. This is another limitation of the present study.

In conclusion, the present study assessed whether RSV has any inhibitory effects on oxidative damage-induced decrease in NP matrix synthesis. Our results demonstrated that RSV enhanced matrix biosynthesis of NP cells through activating cellular autophagy via the PI3K/Akt pathway. The present study sheds a new light on the protective effects of RSV against oxidative damage and provides that RSV may be a promising drug to attenuate oxidative stress-induced disc degeneration.

## Funding

This work was supported by the Scientific Fund of Shandong Traditional Chinese Medicine University [grant number TCMSF-20170471].

## Competing interests

The authors declare that there are no competing interests associated with the manuscript.

## Author contribution

Conception and design of the present study: J.G., Q.Z., and L.S. Experiment performance: J.G., Q.Z., and L.S. Collection, analysis, and explanation of experiment: J.G., Q.Z., and L.S. Drafting and critically revising of this article: J.G., Q.Z., and L.S. All authors approved the final submission.

## Abbreviations

BSA, bull serum albumin; DMMB, 1,9-dimethyl methylene blue; ECM, extracellular matrix; GAG, glycosaminoglycan; ICC, immunocytochemical; IVD, intervertebral disc; LBP, low back pain; NP, nucleus pulposus; PBS, phosphate buffer solution; RSV, resveratrol; 3-MA, 3-methyladenine.

## References

- 1 Luoma, K., Riihimäki, H., Luukkonen, R., Raininko, R., Viikari-Juntura, E. and Lamminen, A. (2000) Low back pain in relation to lumbar disc degeneration. *Spine* **25**, 487–492, <https://doi.org/10.1097/00007632-200002150-00016>
- 2 Waddell, G. (1996) Low back pain: a twentieth century health care enigma. *Spine* **21**, 2820–2825, <https://doi.org/10.1097/00007632-199612150-00002>
- 3 Vo, N.V., Hartman, R.A., Patil, P.R., Risbud, M.V., Kleitas, D., Iatridis, J.C. et al. (2016) Molecular mechanisms of biological aging in intervertebral discs. *J. Orthop. Res.* **34**, 1289–1306, <https://doi.org/10.1002/jor.23195>
- 4 Risbud, M.V. and Shapiro, I.M. (2014) Role of cytokines in intervertebral disc degeneration: pain and disc content. *Nat. Rev. Rheumatol.* **10**, 44–56, <https://doi.org/10.1038/nrrheum.2013.160>
- 5 Wang, W.J., Yu, X.H., Wang, C., Yang, W., He, W.S., Zhang, S.J. et al. (2015) MMPs and ADAMTSs in intervertebral disc degeneration. *Clin. Chim. Acta* **448**, 238–246, <https://doi.org/10.1016/j.cca.2015.06.023>
- 6 Boos, N., Weissbach, S., Rohrbach, H., Weiler, C., Spratt, K.F. and Nerlich, A.G. (2002) Classification of age-related changes in lumbar intervertebral discs: 2002 Volvo Award in basic science. *Spine* **27**, 2631–2644, <https://doi.org/10.1097/00007632-200212010-00002>
- 7 Vergroesen, P.P., Kingma, I., Emanuel, K.S., Hoogendoorn, R.J., Welting, T.J., van Royen, B.J. et al. (2015) Mechanics and biology in intervertebral disc degeneration: a vicious circle. *Osteoarthritis Cartil.* **23**, 1057–1070, <https://doi.org/10.1016/j.joca.2015.03.028>
- 8 Rubinsztein, D.C., Marino, G. and Kroemer, G. (2011) Autophagy and aging. *Cell* **146**, 682–695, <https://doi.org/10.1016/j.cell.2011.07.030>
- 9 Duarte, J.H. (2015) Osteoarthritis: autophagy prevents age-related OA. *Nat. Rev. Rheumatol.* **11**, 683, <https://doi.org/10.1038/nrrheum.2015.145>
- 10 Kiriya, Y. and Nochi, H. (2015) The function of autophagy in neurodegenerative diseases. *Int. J. Mol. Sci.* **16**, 26797–26812, <https://doi.org/10.3390/ijms161125990>
- 11 Kong, C.G., Park, J.B., Kim, M.S. and Park, E.Y. (2014) High glucose accelerates autophagy in adult rat intervertebral disc cells. *Asian Spine J.* **8**, 543–548, <https://doi.org/10.4184/asj.2014.8.5.543>

- 12 Jiang, L., Zhang, X., Zheng, X., Ru, A., Ni, X., Wu, Y. et al. (2013) Apoptosis, senescence, and autophagy in rat nucleus pulposus cells: implications for diabetic intervertebral disc degeneration. *J. Orthop. Res.* **31**, 692–702, <https://doi.org/10.1002/jor.22289>
- 13 Ye, W., Zhu, W., Xu, K., Liang, A., Peng, Y., Huang, D. et al. (2013) Increased macroautophagy in the pathological process of intervertebral disc degeneration in rats. *Connect. Tissue Res.* **54**, 22–28, <https://doi.org/10.3109/03008207.2012.715702>
- 14 Jiang, W., Zhang, X., Hao, J., Shen, J., Fang, J., Dong, W. et al. (2014) SIRT1 protects against apoptosis by promoting autophagy in degenerative human disc nucleus pulposus cells. *Sci. Rep.* **4**, 7456, <https://doi.org/10.1038/srep07456>
- 15 Cottart, C.H., Nivet-Antoine, V. and Beaudoux, J.L. (2014) Review of recent data on the metabolism, biological effects, and toxicity of resveratrol in humans. *Mol. Nutr. Food Res.* **58**, 7–21, <https://doi.org/10.1002/mnfr.201200589>
- 16 Li, K., Li, Y., Mi, J., Mao, L., Han, X. and Zhao, J. (2018) Resveratrol protects against sodium nitroprusside induced nucleus pulposus cell apoptosis by scavenging ROS. *Int. J. Mol. Med.* **41**, 2485–2492
- 17 Li, P., Xu, J., Wu, X., Guo, Z., Fan, L., Song, R. et al. (2017) Resveratrol attenuates high glucose-induced nucleus pulposus cell apoptosis and senescence through activating the ROS-mediated PI3K/Akt pathway. *Biosci. Rep.* **38**, pii: BSR20171703
- 18 Wang, X.H., Zhu, L., Hong, X., Wang, Y.T., Wang, F., Bao, J.P. et al. (2016) Resveratrol attenuated TNF-alpha-induced MMP-3 expression in human nucleus pulposus cells by activating autophagy via AMPK/SIRT1 signaling pathway. *Exp. Biol. Med. (Maywood)* **241**, 848–853, <https://doi.org/10.1177/1535370216637940>
- 19 Zhang, B., Xu, L., Zhuo, N. and Shen, J. (2017) Resveratrol protects against mitochondrial dysfunction through autophagy activation in human nucleus pulposus cells. *Biochem. Biophys. Res. Commun.* **493**, 373–381, <https://doi.org/10.1016/j.bbrc.2017.09.015>
- 20 Zhang, Z., Wen, F., He, C. and Yu, J. (2018) Resveratrol attenuates mechanical compression-induced nucleus pulposus cell apoptosis through regulating the ERK1/2 signaling pathway in a disc organ culture. *Biosci. Rep.* **38**, pii: BSR20171703, <https://doi.org/10.1042/BSR20171703>
- 21 Suzuki, S., Fujita, N., Hosogane, N., Watanabe, K., Ishii, K., Toyama, Y. et al. (2015) Excessive reactive oxygen species are therapeutic targets for intervertebral disc degeneration. *Arthritis Res. Ther.* **17**, 316, <https://doi.org/10.1186/s13075-015-0834-8>
- 22 Risbud, M.V., Fertala, J., Vresilovic, E.J., Albert, T.J. and Shapiro, I.M. (2005) Nucleus pulposus cells upregulate PI3K/Akt and MEK/ERK signaling pathways under hypoxic conditions and resist apoptosis induced by serum withdrawal. *Spine* **30**, 882–889, <https://doi.org/10.1097/01.brs.0000159096.11248.6d>
- 23 Farndale, R.W., Sayers, C.A. and Barrett, A.J. (1982) A direct spectrophotometric microassay for sulfated glycosaminoglycans in cartilage cultures. *Connect. Tissue Res.* **9**, 247–248, <https://doi.org/10.3109/03008208209160269>
- 24 Zhang, S.J., Yang, W., Wang, C., He, W.S., Deng, H.Y., Yan, Y.G. et al. (2016) Autophagy: a double-edged sword in intervertebral disk degeneration. *Clin. Chim. Acta* **457**, 27–35, <https://doi.org/10.1016/j.cca.2016.03.016>
- 25 Cabraja, M., Endres, M., Abbushi, A., Zenclussen, M., Blechschmidt, C., Lemke, A.J. et al. (2013) Effect of degeneration on gene expression of chondrogenic and inflammatory marker genes of intervertebral disc cells: a preliminary study. *J. Neurosurg. Sci.* **57**, 307–316
- 26 Silagi, E.S., Shapiro, I.M. and Risbud, M.V. (2018) Glycosaminoglycan synthesis in the nucleus pulposus: dysregulation and the pathogenesis of disc degeneration. *Matrix Biol.*, <https://doi.org/10.1016/j.matbio.2018.02.025>
- 27 Klionsky, D.J. and Emr, S.D. (2000) Autophagy as a regulated pathway of cellular degradation. *Science* **290**, 1717–1721, <https://doi.org/10.1126/science.290.5497.1717>
- 28 Jiang, L., Yuan, F., Yin, X. and Dong, J. (2014) Responses and adaptations of intervertebral disc cells to microenvironmental stress: a possible central role of autophagy in the adaptive mechanism. *Connect. Tissue Res.* **55**, 311–321, <https://doi.org/10.3109/03008207.2014.942419>
- 29 Feng, C., Yang, M., Lan, M., Liu, C., Zhang, Y., Huang, B. et al. (2017) ROS: crucial intermediators in the pathogenesis of intervertebral disc degeneration. *Oxid. Med. Cell. Longev.* **2017**, 5601593, <https://doi.org/10.1155/2017/5601593>
- 30 Xu, K., Chen, W., Wang, X., Peng, Y., Liang, A., Huang, D. et al. (2015) Autophagy attenuates the catabolic effect during inflammatory conditions in nucleus pulposus cells, as sustained by NF-kappaB and JNK inhibition. *Int. J. Mol. Med.* **36**, 661–668, <https://doi.org/10.3892/ijmm.2015.2280>
- 31 Fu, S., Lv, R., Wang, L., Hou, H., Liu, H. and Shao, S. (2018) Resveratrol, an antioxidant, protects spinal cord injury in rats by suppressing MAPK pathway. *Saudi J. Biol. Sci.* **25**, 259–266, <https://doi.org/10.1016/j.sjbs.2016.10.019>
- 32 Li, J., Li, L., Wang, S., Zhang, C., Zheng, L., Jia, Y. et al. (2018) Resveratrol alleviates inflammatory responses and oxidative stress in rat kidney ischemia-reperfusion injury and H<sub>2</sub>O<sub>2</sub>-induced NRK-52E cells via the Nrf2/TLR4/NF-kappaB pathway. *Cell. Physiol. Biochem.* **45**, 1677–1689, <https://doi.org/10.1159/000487735>
- 33 Zhang, X., Xu, W., Su, J., Chu, M., Jin, H., Li, G. et al. (2014) The prosurvival role of autophagy in resveratrol-induced cytotoxicity in GH3 cells. *Int. J. Mol. Med.* **33**, 987–993, <https://doi.org/10.3892/ijmm.2014.1660>
